# Supplementary material for: Next-Generation Sequencing-Based Study of Helicobacter pylori Isolates from Myanmar and Their Susceptibility to Antibiotics
Source: MDPI journal article supplement (doi:10.3390/microorganisms10010196), 2022-01-17
Supplement: s1 [file s1]

**Supplementary Table S1.** The selected *H. pylori* strains for genotyping study by whole-genome sequencing.

| Patterns               | No. | Strains | AMX | CAM | LVX | MNZ | TCN |
|------------------------|-----|---------|-----|-----|-----|-----|-----|
| All sensitive          | 1   | MMM 8   | S   | S   | S   | S   | S   |
|                        | 2   | MMM 23  | S   | S   | S   | S   | S   |
|                        | 3   | MMM 26  | S   | S   | S   | S   | S   |
|                        | 4   | MMM 58  | S   | S   | S   | S   | S   |
|                        | 5   | MMM 90  | S   | S   | S   | S   | S   |
| Single-drug resistance | 6   | MMM 44  | S   | S   | R   | S   | S   |
|                        | 7   | MMM 54  | S   | S   | R   | S   | S   |
|                        | 8   | MMM 74  | S   | S   | S   | R   | S   |
|                        | 9   | MMM 84  | S   | S   | S   | R   | S   |
|                        | 10  | MMM 86  | S   | R   | S   | S   | S   |
|                        | 11  | MMM 108 | S   | S   | S   | R   | S   |
|                        | 12  | MMM 137 | S   | S   | S   | R   | S   |
| Double-drug resistance | 13  | MMM 3   | R   | R   | S   | S   | S   |
|                        | 14  | MMM 25  | R   | S   | S   | R   | S   |
|                        | 15  | MMM 33  | S   | S   | R   | R   | S   |
|                        | 16  | MMM 37  | R   | S   | R   | S   | S   |
|                        | 17  | MMM 47  | S   | S   | R   | R   | S   |
|                        | 18  | MMM 62  | S   | S   | R   | R   | S   |
|                        | 19  | MMM 135 | S   | S   | R   | R   | S   |
|                        | 20  | MMM 145 | S   | S   | R   | R   | S   |
| Triple-drug resistance | 21  | MMM 43  | S   | R   | R   | R   | S   |
|                        | 22  | MMM 131 | S   | R   | R   | R   | S   |
|                        | 23  | MMM 149 | S   | R   | R   | R   | S   |

R; Resistance S; Sensitive

**Supplementary Table S2.** Mutations in *rdxA* and *frxA* that were associated with MNZ-resistance.

| Gene        | Strain     | MMM25                | MMM33                         | MMM43 | MMM47 | MMM62 | MMM74 | MM84 | MMM108 | MMM131 | MMM135 | MMM137 | MMM145 | MMM149 |     |     |
|-------------|------------|----------------------|-------------------------------|-------|-------|-------|-------|------|--------|--------|--------|--------|--------|--------|-----|-----|
|             | MIC (mg/L) | 256                  | >256                          | 16    | 96    | 96    | >256  | 128  | 16     | 128    | >256   | >256   | 32     | 24     |     |     |
| <i>rdxA</i> | Position   |                      | Could not obtain the sequence |       |       |       |       |      |        |        |        |        |        |        |     |     |
|             | 6          |                      |                               |       |       |       |       |      |        |        | R/H    |        |        |        |     |     |
|             | 16         |                      |                               |       |       |       |       |      | R/H    | R/H    |        | R/C    | R/H    |        |     |     |
|             | 56         |                      |                               |       |       | H/R   |       |      |        |        |        |        | H/R    |        |     |     |
|             | 65         |                      |                               |       |       |       |       |      |        | L/V    |        |        | L/V    | L/V    |     |     |
|             | 70         |                      |                               |       |       |       |       |      |        |        |        |        |        |        | A/V |     |
|             | 71         |                      |                               |       |       |       |       | A/V  |        |        |        |        |        |        |     |     |
|             | 83         |                      |                               |       |       |       |       |      |        | A/S    |        |        |        |        |     |     |
|             | 91         |                      |                               |       |       |       |       |      | S/P    | S/P    |        | S/P    | S/P    | S/P    |     |     |
|             | 97         |                      |                               |       | L/F   |       |       |      |        |        |        |        |        |        |     |     |
|             | 98         |                      |                               |       | L/V   |       |       |      |        |        |        |        |        |        |     |     |
|             | 99         |                      |                               |       | P/A   |       |       |      |        |        |        |        |        |        |     |     |
|             | 116        |                      |                               |       |       |       |       | V/M  |        |        |        |        |        |        |     |     |
|             | 121        |                      |                               |       |       | A/F   |       |      |        |        |        |        | A/S    |        |     |     |
|             | 122        |                      |                               |       |       | A/L   |       |      |        |        |        |        |        |        |     |     |
|             | 143        |                      |                               |       |       |       | C/*   |      |        |        |        |        |        |        |     |     |
|             | 170        |                      |                               |       |       |       |       |      |        |        | L/C    |        |        |        |     |     |
|             | 171        |                      |                               |       |       |       |       |      |        |        | K/*    |        |        |        |     |     |
|             | 175        | V/I                  |                               |       |       | V/I   |       |      |        | V/I    | V/I    |        | V/I    | V/I    | V/I | V/I |
|             | 196        |                      |                               |       |       |       |       |      | A/T    |        |        |        |        |        |     |     |
|             | 209        | A/T                  |                               |       |       |       |       |      |        |        |        |        |        |        |     |     |
|             | 212        |                      |                               |       |       |       |       |      |        |        |        |        | W/*    |        |     |     |
| <i>frxA</i> | 19         | No mutation detected |                               |       |       |       |       |      |        |        | Y/T    |        |        |        |     |     |
|             | 20         |                      |                               |       |       |       |       |      |        |        | D/I    |        |        |        |     |     |
|             | 23         |                      |                               |       |       |       |       |      |        |        | R/V    |        |        |        |     |     |
|             | 24         |                      |                               |       |       |       |       |      |        |        | R/V    |        |        |        |     |     |
|             | 25         |                      |                               |       |       |       |       |      |        |        | I/F    |        |        |        |     |     |
|             | 26         |                      |                               |       |       |       |       |      |        |        | S/P    |        |        |        |     |     |
|             | 27         |                      |                               |       |       |       |       |      |        |        | Q/K    |        |        |        |     |     |
|             | 28         |                      |                               |       |       |       |       |      |        |        | K/R    |        |        |        |     |     |
|             | 29         |                      |                               |       |       |       |       |      |        |        | D/I    |        |        |        |     |     |
|             | 30         |                      |                               |       |       |       |       |      |        |        | W/G    |        |        |        |     |     |
|             | 31         |                      |                               |       |       |       |       |      |        |        | E/K    |        |        |        |     |     |
|             | 33         |                      | L/M                           |       |       |       |       |      |        |        |        | L/M    |        |        | L/M |     |
|             | 37         |                      |                               |       |       |       |       |      |        |        | G/R    |        |        |        |     |     |
|             | 40         |                      |                               |       |       |       |       |      |        |        |        |        |        |        | A/S |     |
|             | 43         |                      |                               |       |       |       |       |      |        |        |        |        | S/A    |        |     |     |
|             | 60         |                      |                               |       |       | K/R   | K/R   |      |        |        |        |        |        |        |     |     |
|             | 83         |                      |                               |       |       |       |       | Y/S  |        |        |        |        |        |        |     |     |

|     |  |  |     |  |     |  |  |  |  |  |     |     |     |  |
|-----|--|--|-----|--|-----|--|--|--|--|--|-----|-----|-----|--|
| 85  |  |  |     |  | A/V |  |  |  |  |  |     |     |     |  |
| 98  |  |  |     |  |     |  |  |  |  |  |     | K/E |     |  |
| 101 |  |  |     |  |     |  |  |  |  |  |     | H/M |     |  |
| 102 |  |  |     |  |     |  |  |  |  |  |     | E/R |     |  |
| 103 |  |  |     |  |     |  |  |  |  |  |     | V/L |     |  |
| 110 |  |  |     |  |     |  |  |  |  |  | T/A |     |     |  |
| 117 |  |  |     |  |     |  |  |  |  |  | I/M |     | I/M |  |
| 154 |  |  |     |  |     |  |  |  |  |  |     |     | A/T |  |
| 184 |  |  | A/V |  |     |  |  |  |  |  | A/M |     |     |  |
| 192 |  |  |     |  |     |  |  |  |  |  |     |     |     |  |
| 193 |  |  |     |  |     |  |  |  |  |  |     |     |     |  |

A; Alanine, C; Cysteine, D; Aspartic acid, E; Glutamic acid, F; Phenylalanine, G; Glycine, H; Histidine, I; Isoleucine, K; Lysine, L; Leucine, M; Methionine, P; Proline, Q; Glutamine, R; Arginine, S; Serine, T; Threonine, V; Valine, W; Tryptophan, Y; Tyrosine, \*; Translation stop, MMM; bacteria strain

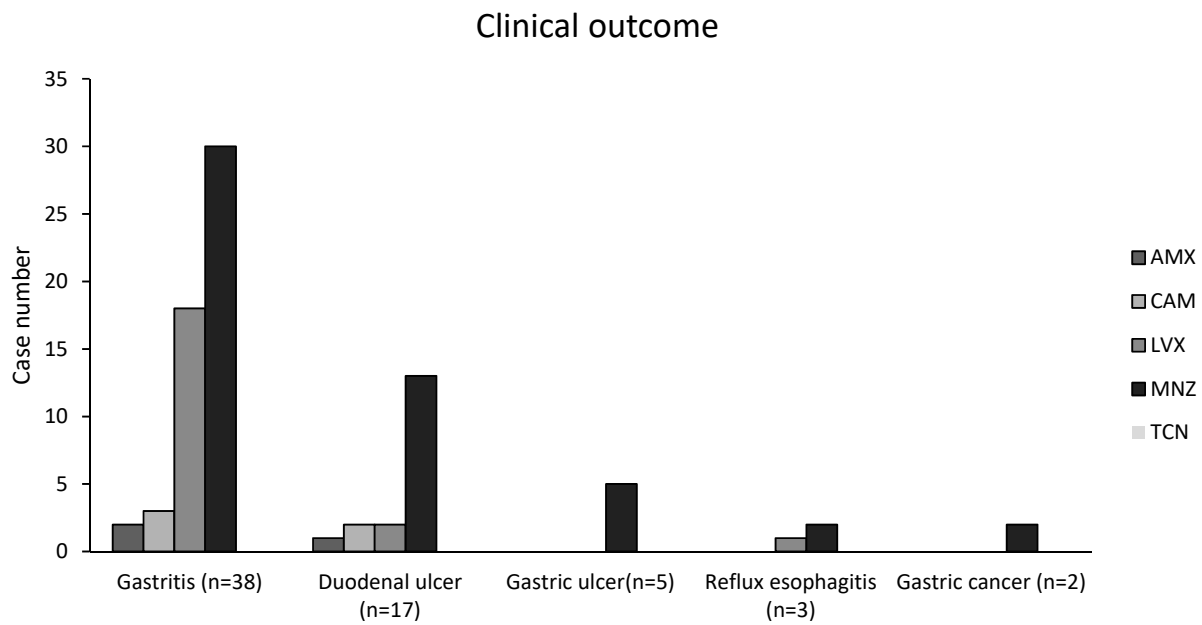

**Supplementary Figure S1.** Distribution of antibiotic resistance based on the clinical outcome. AMX; amoxicillin, CAM; clarithromycin, LVX; levofloxacin, MNZ; metronidazole, TCN; tetracycline.
